## CORRECTION

# Correction: Transcriptional regulation of intermediate progenitor cell generation during hippocampal development (doi: 10.1242/dev.140681)

**Lachlan Harris, Oressia Zalucki, Ilan Gobius, Hannah McDonald, Jason Osinki, Tracey J. Harvey, Alexandra Essebier, Diana Vidovic, Ivan Gladwyn-Ng, Thomas H. Burne, Julian I. Heng, Linda J. Richards, Richard M. Gronostajski and Michael Piper**

There was an error in *Development* (2016) **143**, 4620-4630 (doi: 10.1242/dev.140681).

On page 11 of the supplementary information, an equation to calculate  $T_c$  was given incorrectly as  $T_c = T_s / (\text{BrdU}^+ / \text{BrdU}^-)$ . The correct equation is  $T_c = T_s / (\text{BrdU}^+ / \text{Radial Glia})$ . The correct equation was used to calculate the  $T_c$  values presented in Figure 3E; therefore, this error does not affect the scientific conclusions of the paper.

The authors apologise to readers for this mistake.
